# Supplementary material for: Enhanced mast cell activation in mice deficient in the A2b adenosine receptor
Source: PubMed Central journal article supplement — J Exp Med. 2007 Jan 22;204(1):117–28. doi: 10.1084/jem.20061372 (PMC2118413; doi:10.1084/jem.20061372), 2007-01-22
Supplement: jexpmed_jem.20061372_3.pdf [file jexpmed_jem.20061372_3.pdf]

**Hua et al.**, <http://www.jem.org/cgi/content/full/jem.20061372/DC1>

**SUPPLEMENTAL MATERIALS AND METHODS**

**Mouse peritoneal lavage.**

Mice were killed by carbon dioxide, and 3 ml of culture medium without cytokines was injected intra-peritoneally. After gentle shaking, 2 ml of peritoneal lavage liquid was collected by Pasteur pipette.
